# Supplementary material
Source: PubMed Central journal article supplement (PMC4801354)
Supplement: NIHMS768117-supplement-Supplemental.pdf [file NIHMS768117-supplement-Supplemental.pdf]

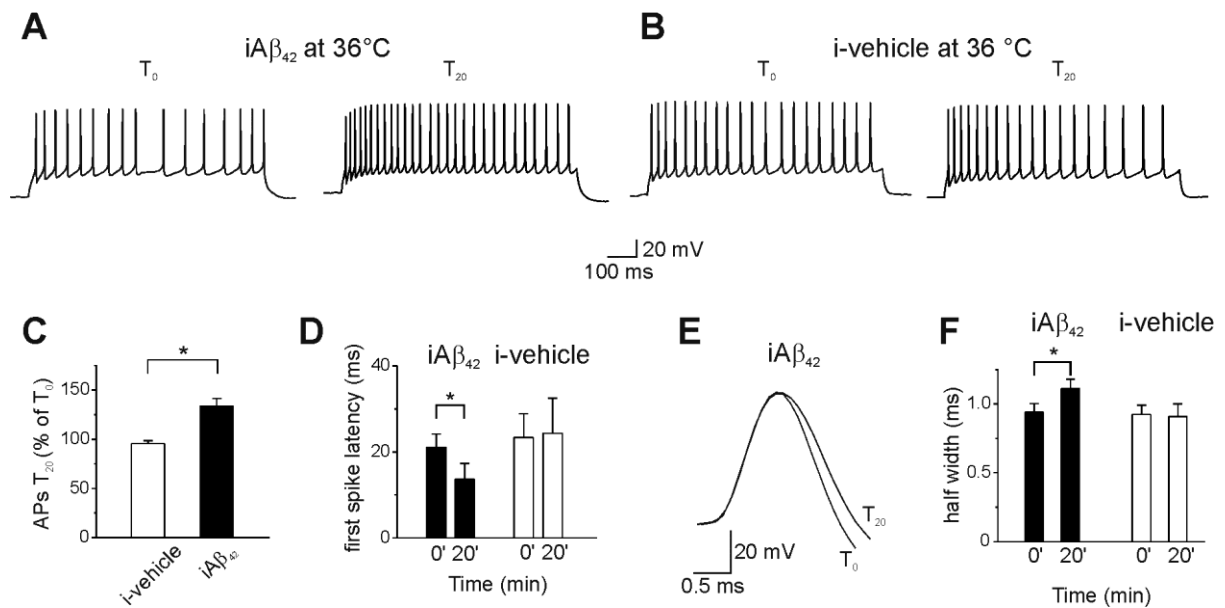

**Supplementary figure 1. Intracellular perfusion of  $A\beta_{42}$  increases primary hippocampal neuron excitability also at more physiological temperature (36°C).** (A) Examples of whole-cell recordings at 36°C. Twenty min of intracellular perfusion of  $A\beta_{42}$  via the patch-pipette produced an increase in APs number comparable to what observed at room temperature and reported in figure 1. (B) Intracellular vehicle perfusion had no effect on neuronal excitability. (C, D and F) Bar graphs showing the effects of intracellular perfusion of  $A\beta_{42}$  and vehicle (at 36°C) in terms of: i) Percent changes in APs number ( $A\beta_{42}$ :  $T_0 = 21.7 \pm 1.9$ ;  $T_{20} = 29.3 \pm 3.4$ ;  $n = 6$ ;  $p < 0.05$ ; paired t-test); ii) first spike latency ( $A\beta_{42}$ :  $T_0 = 21.1 \pm 3.0$  ms;  $T_{20} = 13.7 \pm 3.6$  ms;  $n = 6$ ;  $p < 0.05$ ; paired t-test) and iii) half width ( $A\beta_{42}$ :  $T_0 = 0.9 \pm 0.1$  ms;  $T_{20} = 1.1 \pm 0.1$  ms;  $n = 6$ ;  $p < 0.05$ ; paired t-test; see also representative traces in E).

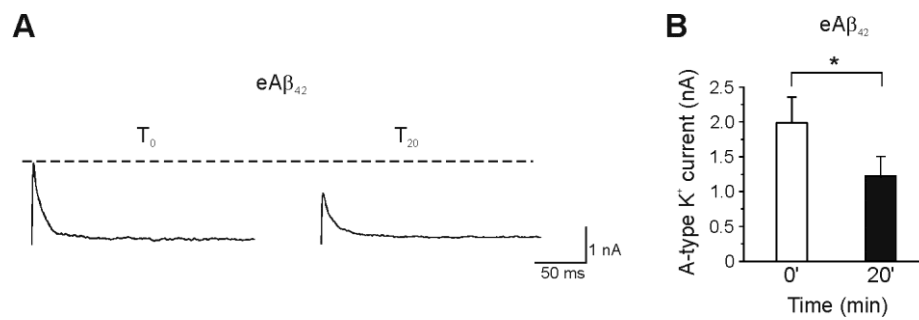

**Supplementary figure 2. Extracellular Aβ<sub>42</sub> reduces transient A-type K<sup>+</sup> currents in primary mouse hippocampal neurons.** (A) Representative traces showing the reduction of transient A-type K<sup>+</sup> currents after 20 min of extracellular application of Aβ<sub>42</sub>. (B) Bar graph summarizing data from experiments shown in A (*n* = 6).

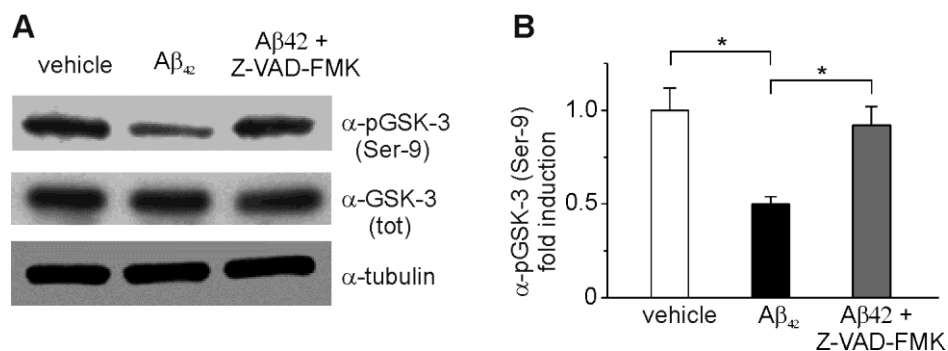

**Supplementary figure 3. Caspase inhibition prevents the Aβ<sub>42</sub>-induced decrease in phosphorylated GSK-3 at Ser-9.** Representative Western blots of hippocampal proteins showing immunoreactivity for phosphorylated GSK-3 at Ser-9 following 40 min of Aβ<sub>42</sub> stimulation (alone or after 30 min of pre-treatment with caspase inhibitor Z-VAD-FMK). Densitometry for the blots probed with Ser-9 phosphorylated GSK-3 normalized to ~ total GSK-3 is shown (*n* = 3; *p* < 0.05; statistics by Mann-Whitney test).

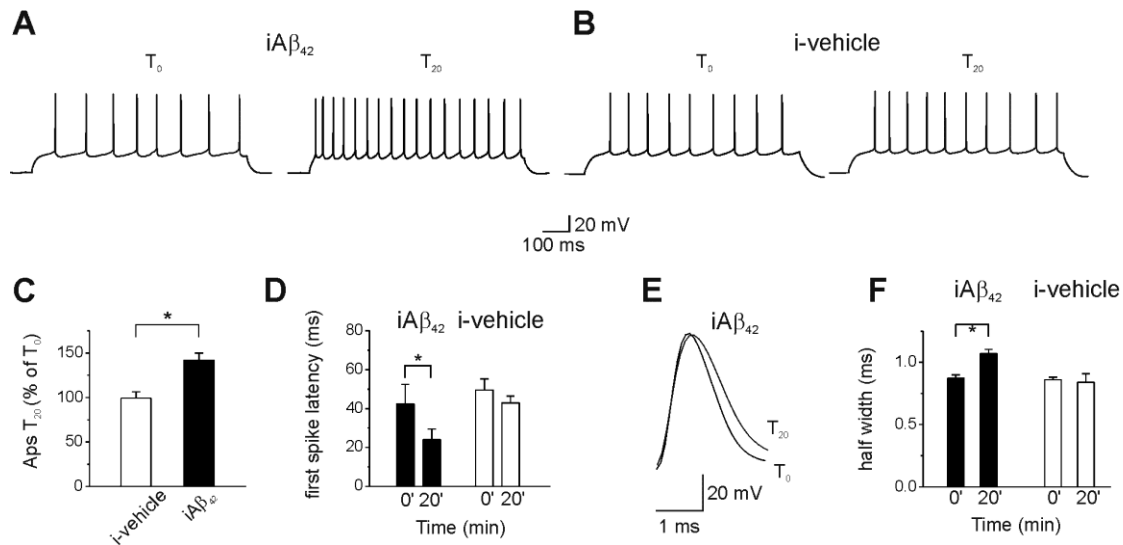

**Supplementary figure 4. Intracellular perfusion of  $A\beta_{42}$  increases CA1 hippocampal pyramidal neuron excitability in acute slices preparation.** (A) Representative current clamp traces, recorded in CA1 hippocampal pyramidal neurons from non-Tg slices, showing the increase in APs number after 20 min of intracellular perfusion of  $A\beta_{42}$  via patch-pipette. (B) Intracellular vehicle perfusion had no effect on neuronal excitability. (C) Bar graph summarizing data from experiments shown in A and B ( $A\beta_{42}$   $n = 6$ ; vehicle  $n = 5$ ;  $p < 0.05$ ). (D) Bar graph showing first spike latency in the two experimental conditions ( $A\beta_{42}$   $n = 6$ ; vehicle  $n = 5$ ;  $p < 0.05$ ). (E) Representative traces showing the AP width in  $A\beta_{42}$ -injected neuron. (F) Bar graph showing mean values of spike half-width after 20 min of intracellular perfusion of  $A\beta_{42}$  ( $n = 6$ ;  $p < 0.05$ ) and vehicle ( $n = 5$ ;  $p > 0.05$ ).
